# Supplementary material for: Selective hydride generation-cryotrapping-ICP-MS for arsenic speciation analysis at picogram levels: analysis of river and sea water reference materials and human bladder epithelial cells
Source: Royal Society of Chemistry journal article supplement (doi:10.1039/c3ja50021g), 2013-01-01

**Selective hydride generation- cryotrapping- ICP-MS for arsenic speciation analysis at picogram levels: analysis of river and sea water reference materials and human bladder epithelial cells**

Tomáš Matoušek, Jenna M. Currier, Nikola Trojánková, R. Jesse Saunders, María C. Ishida, Carmen González-Horta, Stanislav Musil, Zoltán Mester, Miroslav Stýblo, Jiří Dědina

**Supplementary information:**

Table S1:  
 ISIS program for HG-CT-ICP-MS System 1

| Step | Duration, s | Scan  | Pump 1, rps | Pump 2, rps | Valve 1 | Aux1 (heating power) | Aux 2 (heating indicator) |
|------|-------------|-------|-------------|-------------|---------|----------------------|---------------------------|
| 1    | <P1>        | -     | 0           | <P17>       | LOAD    | OFF                  | OFF                       |
| 2    | <P2>        | -     | <P12>       | <P15>       | LOAD    | OFF                  | OFF                       |
| 3    | <P3>        | -     | <P13>       | 0           | INJECT  | OFF                  | OFF                       |
| 4    | <P4>        | -     | <P13>       | <P16>       | INJECT  | OFF                  | OFF                       |
| 5    | <P5>        | -     | 0           | 0           | INJECT  | OFF                  | OFF                       |
| 6    | 12          | -     | 0           | 0           | INJECT  | OFF                  | ON                        |
| 7    | <P6>        | -     | 0           | 0           | INJECT  | ON                   | ON                        |
| 8    | <P7>        | Start | 0           | 0           | INJECT  | ON                   | ON                        |
| 9    | <P8>        | -     | 0           | 0           | INJECT  | OFF                  | OFF                       |
| 10   | <P9>        | -     | 0           | 0           | INJECT  | ON                   | ON                        |
| 11   | <P10>       | -     | 0           | <P17>       | INJECT  | ON                   | ON                        |
| 12   | <P11>       | -     | <P14>       | <P17>       | INJECT  | OFF                  | OFF                       |
| 13   | 1           | -     | 0           | 0           | LOAD    | OFF                  | OFF                       |

| Parameters | Description            | Unit | Default value |
|------------|------------------------|------|---------------|
| <P1>       | Time Pre-cool          | s    | 30            |
| <P2>       | Time Prefill           | s    | 5             |
| <P3>       | Time HG, P2 OFF        | s    | 90*           |
| <P4>       | Time HG, P2 ON         | s    | 0*            |
| <P5>       | Time Delay             | s    | 80            |
| <P6>       | Time Acq. delay        | s    | 5             |
| <P7>       | Time Acquisition 1     | s    | 37**          |
| <P8>       | Time Acq. 2 (Heat off) | s    | 7             |
| <P9>       | Time Acquisition 3     | s    | 22***         |
| <P10>      | Time U-Tube cleaning   | s    | 35            |
| <P11>      | Time HG cleaning       | s    | 50            |
| <P12>      | P1 Rate Prefill        | rps  | 0.25          |
| <P13>      | P1 Rate HG             | rps  | 0.25          |
| <P14>      | P1 Rate Post-run       | rps  | 0             |
| <P15>      | P2 Rate Prefill        | rps  | 0.5           |
| <P16>      | P2 Rate HG             | rps  | 0             |
| <P17>      | P2 Rate Post-run       | rps  | 0.65          |

\* for 500 µl loop

\*\* Set to the approximate MAs peak maximum retention time.

\*\* (64s - (<P6> + <P7>)), to keep total heating time constant.

Table S2: FIAS program for HG-CT-ICP-MS Systems 2 and 3

| Step | Time, s | Pump 1 | Pump 2 | Inj. Vent | Remote 5 (heating) |                                                                 |
|------|---------|--------|--------|-----------|--------------------|-----------------------------------------------------------------|
| P    | 30      | 0      | 100    | Fill      | -                  | Precooling of U tube                                            |
| 1    | 25*     | 40     | 100    | Fill      | -                  | Prefill of injection loop                                       |
| 2    | 60*     | 40     | 0      | Inject    | -                  | HG step                                                         |
| 3    | 90      | 0      | 0      | Inject    | -                  | Liquid nitrogen Dewar is removed 7 sec before the end of Step 3 |
| 4    | 42**    | 0      | 0      | Fill      | ON                 | READ step; hydrides released from U-tube                        |
| 5    | 7       | 0      | 0      | Inject    | -                  | Heating break to improve DMAs- TMAs <sup>V</sup> O resolution   |
| 6    | 22***   | 0      | 0      | Fill      | ON                 |                                                                 |
| 7    | 35      | 0      | 120    | Inject    | ON                 | U-tube drying                                                   |
| 8    | 3       | 0      | 0      | Fill      | -                  |                                                                 |

\* for 500  $\mu$ l loop

\*\* set to the approximate MAs peak retention time.

\*\*\* (64sec- Step4), to keep total heating time (steps 4 to 7) constant.



Table S3. Results of comparative BEC sample analyses.

| Sample code | Cells per 300 ul | System 2 (UNC)                                     |   |    |     |   |    |      |   |    | System 1 (IAC)                                    |   |    |     |   |    |      |   |   |
|-------------|------------------|----------------------------------------------------|---|----|-----|---|----|------|---|----|---------------------------------------------------|---|----|-----|---|----|------|---|---|
|             |                  | pg As per 300 ul aliquot ± 95% confidence interval |   |    |     |   |    |      |   |    | pg As per 300ul aliquot ± 95% confidence interval |   |    |     |   |    |      |   |   |
|             |                  | iAs                                                |   |    | MAs |   |    | DMAs |   |    | iAs                                               |   |    | MAs |   |    | DMAs |   |   |
| 904         | 710500           | 676                                                | ± | 21 | 180 | ± | 17 | 21   | ± | 8  | 811                                               | ± | 26 | 203 | ± | 3  | 24   | ± | 1 |
| 994         | 198000           | 345                                                | ± | 23 | 46  | ± | 11 | 11   | ± | 8  | 362                                               | ± | 22 | 45  | ± | 1  | 10   | ± | 1 |
| 995         | 198000           | 60                                                 | ± | 14 | 25  | ± | 17 | 192  | ± | 8  | 72                                                | ± | 9  | 24  | ± | 2  | 188  | ± | 9 |
| 1105        | 283200           | 60                                                 | ± | 31 | 9   | ± | 28 | 17   | ± | 29 | 89                                                | ± | 9  | 10  | ± | 1  | 20   | ± | 1 |
| 1107        | 201600           | 1220                                               | ± | 80 | 29  | ± | 28 | 15   | ± | 29 | 1242                                              | ± | 76 | 26  | ± | 2  | 11   | ± | 1 |
| 1167        | 88200            | 139                                                | ± | 13 | 40  | ± | 12 | 32   | ± | 11 | 138                                               | ± | 6  | 45  | ± | 2  | 44   | ± | 3 |
| 1168        | 514500           | 253                                                | ± | 19 | 127 | ± | 25 | 21   | ± | 8  | 249                                               | ± | 6  | 103 | ± | 3  | 24   | ± | 1 |
| 1171        | 737450           | 645                                                | ± | 24 | 167 | ± | 25 | 40   | ± | 8  | 670                                               | ± | 9  | 149 | ± | 3  | 38   | ± | 2 |
| 1183        | 168300           | 216                                                | ± | 13 | 91  | ± | 11 | 176  | ± | 11 | 231                                               | ± | 9  | 94  | ± | 2  | 172  | ± | 7 |
| 1196        | 563500           | 92                                                 | ± | 16 | 12  | ± | 20 | 5    | ± | 10 | 99                                                | ± | 9  | 95  | ± | 22 | 7    | ± | 1 |
| 1199        | 264600           | 56                                                 | ± | 16 | 10  | ± | 20 | 9    | ± | 10 | 39                                                | ± | 6  | 10  | ± | 1  | 11   | ± | 1 |

Fig. S1. Stability of the HG-CT-ICP-MS signals of a mixed standard  $200 \text{ pg mL}^{-1}$   $\text{iAs}^{\text{V}}$  and  $100 \text{ pg mL}^{-1}$   $\text{MAs}^{\text{V}}$  and  $\text{DMAs}^{\text{V}}$ , after  $\text{cys}$  treatment; B- blank. \* Injection error.

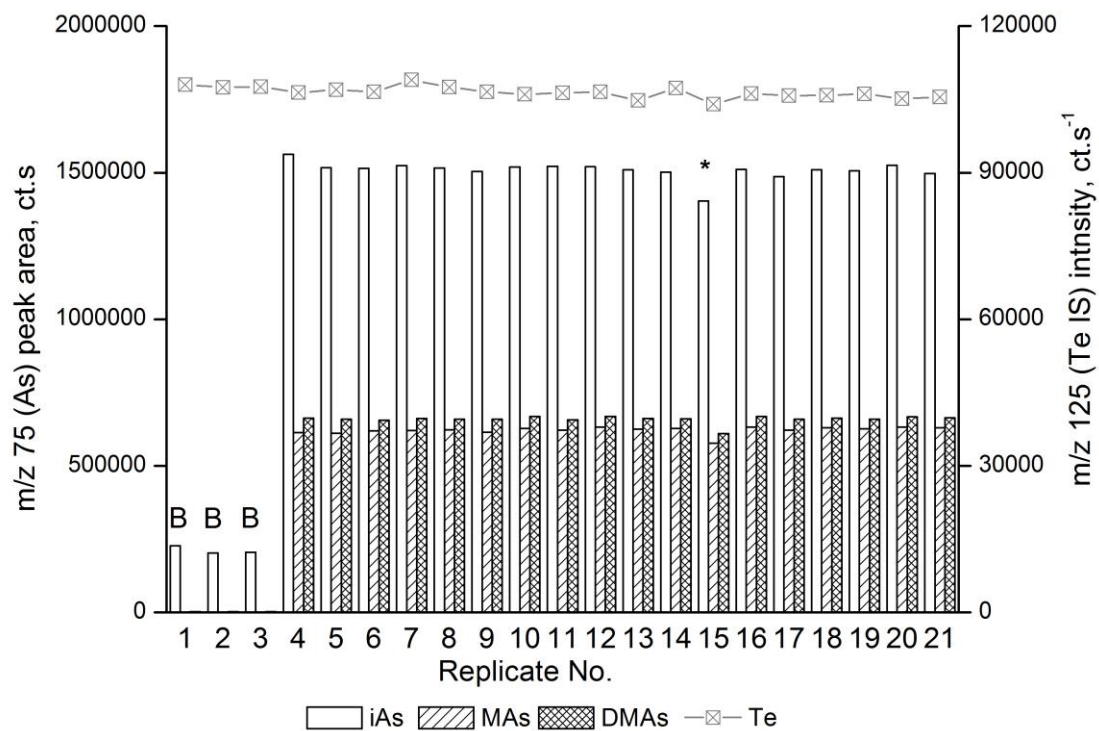

Supplement: c3ja50021g.pdf [file c3ja50021g.pdf]
